# Supplementary material
Source: PubMed Central journal article supplement (PMC7709739)
Supplement: NIHMS1647458-supplement-1.pdf [file NIHMS1647458-supplement-1.pdf]

## 779 **Appendix A. Supplementary Materials**

### 780 **1. Isotopic measurements**

781 The aliquots for Os isotopic analysis were added into chilled Pyrex® Carius tubes, along with  
782 5 ml of concentrated HNO<sub>3</sub> and 2.3 ml of concentrated HCl. The Carius tubes were sealed and  
783 then heated for at least 24 h at 220 °C (Shirey and Walker, 1995). Osmium was extracted from the  
784 solution using CCl<sub>4</sub> solvent-extraction methods (Cohen and Waters, 1996), and then further  
785 purified using microdistillation from a dichromate solution (Birck et al., 1997). This procedure  
786 resulted in ~70 % yield for Os. Between 70-300 ng of purified Os were loaded onto outgassed Pt  
787 filaments in HBr, activated with Ba(OH)<sub>2</sub>, and analyzed as OsO<sub>3</sub><sup>-</sup> by a *Thermo-Fisher Triton*  
788 thermal ionization mass spectrometer (TIMS) at the University of Maryland (UMd) (Walker,  
789 2012). Osmium isotopic data were corrected for instrumental and natural mass fractionation by  
790 normalizing <sup>192</sup>Os/<sup>188</sup>Os to 3.08271 (Allègre and Luck, 1980). Isobaric interferences from OsO<sub>3</sub><sup>-</sup>  
791 species with <sup>17</sup>O or <sup>18</sup>O were corrected using the O isotopic composition reported by Nier (1950).

792 Molybdenum aliquots were prepared following the methods described in Worsham et al.  
793 (2016a). In brief, aliquots were dried, dissolved in 1 M HF, and loaded onto an anion column of  
794 AG 1-X8 (200-400 mesh) resin. Molybdenum was eluted using 6 M HNO<sub>3</sub>-3 M HF, dried, and  
795 dissolved in 6 M HCl. The Mo solution was then added to a smaller anion column with ~0.3 mL  
796 AG 1-X8 (200-400 mesh) resin and eluted with 1 M HCl. This elution was repeated a second time.  
797 This procedure resulted in ~50 % yield for Mo. Purified Mo aliquots were treated with  
798 concentrated HCl and HNO<sub>3</sub> multiple times in order to destroy organics. The samples were then  
799 dissolved in 6 M HCl, about 500-1000 ng Mo were loaded onto outgassed Re filaments, and  
800 activated with ~ 2 µL of a 5 µg/µL La(NO<sub>3</sub>)<sub>3</sub> solution. A double filament assembly was used and  
801 the same amount of La(NO<sub>3</sub>)<sub>3</sub> was added to the ionization Re filament. Molybdenum was measured

802 as  $\text{MoO}_3^-$  by the *Thermo-Fisher Triton Plus* TIMS at UMd. The  $^{100}\text{Mo}^{18}\text{O}^{16}\text{O}_2^-$  species was  
803 measured using a  $10^{13} \Omega$  resistor amplifier for O isotope interference corrections. Molybdenum  
804 isotopic data were corrected for instrumental and natural mass fractionation by normalizing  
805  $^{98}\text{Mo}/^{96}\text{Mo}$  to 1.453171 (Lu and Masuda, 1994).

806 Aliquots for Ru isotopic analysis were prepared following the procedure discussed by  
807 Bermingham et al. (2016). In brief, aliquots of the primary dissolution were dried and dissolved in  
808 0.15 M HCl and then processed through a cation column of AG50WX8 (200-400 mesh) resin.  
809 Ruthenium was immediately eluted using 0.15 M HCl and dried to about 5  $\mu\text{L}$  for microdistillation,  
810 in which  $\text{H}_2\text{Cr}_2\text{O}_7$  was used as the oxidant and 6 M HCl was used as the trap solution and reductant.  
811 This procedure resulted in ~50 % yield for Ru. About 1000 ng of purified Ru were loaded onto  
812 outgassed single Pt filaments in HBr, activated with  $\text{Ba}(\text{OH})_2$ , and analyzed as  $\text{RuO}_3^-$  by a *Thermo-*  
813 *Fisher Triton Plus* TIMS. Ruthenium isotopic data were corrected for instrumental and natural  
814 mass fractionation by normalizing  $^{99}\text{Ru}/^{101}\text{Ru}$  to 0.745075 (Chen et al., 2010). The O isotopic  
815 composition reported by Nier (1950) was used to determine and correct for in-run  $^{17}\text{O}$  and  $^{18}\text{O}$   
816 molecular interferences.

817 Tungsten aliquots from the primary dissolution were exposed to air for 1-2 weeks in order to  
818 oxidize Fe in the solution from +2 to +3. Ferrous Fe was then removed using a diisopropyl ether  
819 extraction procedure (Dodson et al., 1936). The resulting solution was dried, dissolved in 1 M  
820 HCl-0.1 M HF, and eluted through a cation column of AG50-X8 (200-400 mesh) resin with 1 M  
821 HCl-0.1 M HF. The solution was then dried, dissolved in 0.5 M HCl-0.5 M HF, loaded onto a  
822 column of AG1-X8 (100-200 mesh) resin, and eluted with 6 M HCl-1 M HF. This elution was  
823 repeated twice using progressively less resin and acid (Touboul and Walker, 2012). This procedure  
824 resulted in ~60 % yield for W. Organics accrued during the column chemistry were removed by

825 drying the sample multiple times in concentrated HCl and HNO<sub>3</sub>. About 300-1000 ng of purified  
826 W were then dissolved in 1 M HCl- 0.01 M HF, loaded onto outgassed single Re filaments,  
827 activated with 1 μL of a 5 μg/μL La-5 μg/μL Gd solution, and measured as WO<sub>3</sub><sup>-</sup> using a *Thermo-*  
828 *Fisher Triton* TIMS following the method of Archer et al. (2017). This method allowed  
829 independent measurement of both <sup>182</sup>W/<sup>184</sup>W and <sup>183</sup>W/<sup>184</sup>W. Potential mass interference from  
830 ReO<sub>3</sub><sup>-</sup> species were also monitored and corrected for. Tungsten isotopic data were corrected for  
831 instrumental and natural mass fractionation by normalizing <sup>186</sup>W/<sup>184</sup>W to 0.92767 (Volkening et  
832 al., 1991).

833 Some prior studies of terrestrial and cosmochemical materials have observed deviations in  
834 <sup>183</sup>W/<sup>184</sup>W ratios for reference standards and samples that were processed through certain column  
835 chemistry procedures and analyzed by multi-collector inductively-coupled plasma mass  
836 spectrometry (e.g., Kruijer et al., 2013; Cook and Schönbachler, 2016; Kruijer and Kleine, 2018).  
837 Such deviations have been interpreted to be the result of nuclear field shift effects, requiring  
838 corrections to be made to account for the observed deviations (Cook and Schönbachler, 2016).  
839 However, no such effects have been observed for reference standards, terrestrial samples, or  
840 meteorite samples using the column chemistry procedures described here, coupled with thermal  
841 ionization mass spectrometry (Archer et al., 2017; Mundl et al., 2017; Mundl et al., 2018; Archer  
842 et al., 2019). Consequently, no corrections to the measured <sup>183</sup>W/<sup>184</sup>W ratios from this study have  
843 been made.

844 Values of μ<sup>182</sup>W for the SBT were corrected for nucleosynthetic variations using the method  
845 reported by Kruijer et al. (2014a). In this correction, variation in the *r*-process component for irons  
846 is subtracted from the μ<sup>182</sup>W value using μ<sup>183</sup>W as an *r*-process component proxy. This correction  
847 is based on the <sup>182/184</sup>W vs. <sup>183/184</sup>W isotopic composition of fine- and coarse-grained CAI, which

848 give a  $^{182/184}\text{W}$  vs.  $^{183/184}\text{W}$  (186/184 normalized) correlation of  $+1.41 \pm 0.06$ . The  $\Delta T_{\text{CAI}}$  ages were  
849 then calculated using the CAI initial value  $\mu^{182}\text{W}$  of  $-349 \pm 7$  (Kruijer et al., 2014b), the present-  
850 day chondritic  $\mu^{182}\text{W}$  value of  $-190 \pm 10$  (Kleine et al., 2004), and the decay constant for  $^{182}\text{Hf}$  of  
851  $0.078 \pm 0.002 \text{ Myr}^{-1}$  (Vockenhuber et al., 2004). The  $\Delta T_{\text{CAI}}$  ages for Babb's Mill, South Byron,  
852 and ILD 83500 were calculated from the  $\mu^{182}\text{W}$  and  $\mu^{183}\text{W}$  values determined by normalizing to  
853  $^{186}\text{W}/^{184}\text{W}$ . The uncertainties for the  $\Delta T_{\text{CAI}}$  ages include the 2SD determined from the analysis of  
854 standards run during an analytical campaign for  $\mu^{182}\text{W}$  and  $\mu^{183}\text{W}$  compositions, and the  
855 uncertainty associated with the  $\mu^{183}\text{W}$  *r*-process correction only (Kruijer et al., 2014a). Tungsten  
856 isotopic data were not obtained for Milton because there was insufficient material to make this  
857 measurement.

858

## 859 **2. Fractional crystallization modeling**

860 In this study, Eq. S1 is used to calculate the concentration of an element throughout the  
861 evolution of a liquid melt, where  $F_n$  is the fraction of liquid ( $n = 100$  is pure liquid),  $C_{L_n}$  is the  
862 concentration of an element in the liquid phase at  $F_n$ , and  $D_n$  is the partition coefficient of an  
863 element. The concentration of an element is calculated at each 0.1 % fraction of liquid with respect  
864 to the concentration of the previous liquid fraction. For S, a constant partition coefficient of 0.001  
865 is used (Walker et al., 2008). The partition coefficients for P and C are determined at each  $F_n$  by  
866 considering the concentration of S and P or S and C, respectively, in the liquid at  $F_{n+1}$ . Equation  
867 S2 is used to account for the effects of S on P and C partitioning behavior (Chabot and Jones,  
868 2003).

869 Values of  $D_0$  for P and C are taken from Chabot et al. (2017) and Worsham et al. (2016b),  
870 respectively. The  $\beta_{\text{SPC}}$  variable is determined using Eq. S3 (Jones and Malvin, 1990), in which  $\beta_S$

871 and  $\beta_P$  are taken from Chabot et al. (2017) and  $\beta_C$  is taken from Worsham et al. (2016b). For P, the  
 872 effects of C are not considered and for C, the effects of P are not considered. The  $\beta_{SPC}$  and “Fe  
 873 domains” (Eq. S4; Chabot et al., 2017) variables are calculated at each  $F_n$ , where  $X_i$  is the mole  
 874 fraction of an element.

$$875 \quad \text{Eq. S1: } C_{Ln-1} = \frac{C_{Ln}}{(F_{n-1} + 1 - F_{n-1}D_{n-1})}$$

$$876 \quad \text{Eq. S2: } \frac{1}{D} = \frac{[\text{Fe domains}]^{\beta_{SPC}}}{D_o}$$

$$877 \quad \text{Eq. S3: } \beta_{SPC} = \left[ \frac{2X_S}{2X_S + 4X_P + 4X_C} \right] \beta_S + \left[ \frac{4X_P}{2X_S + 4X_P + 4X_C} \right] \beta_P + \left[ \frac{4X_C}{2X_S + 4X_P + 4X_C} \right] \beta_C$$

$$878 \quad \text{Eq. S4: Fe domains} = \frac{1 - 2X_S - 4X_P - 4X_C}{1 - X_S - 3X_P - 3X_C}$$

$$879 \quad \text{Eq. S5: } C_{Sn} = C_{Ln}D_n$$

880 After determining the concentration of S, P, and C at each  $F_n$ , the D values for the HSE are  
 881 calculated at each  $F_n$  using Eq. S2-S4 by collectively considering the changes in S, P, and C content  
 882 in the liquid (Jones and Malvin, 1990; Chabot and Jones, 2003; Worsham et al., 2016b; Chabot et  
 883 al., 2017). The concentration of HSE in the liquid at each  $F_n$  is then determined using Eq. S1 and  
 884 the solid composition ( $C_{Sn}$ ) at each  $F_n$  is determined using Eq. S5.

885

### 886 **3. Thermal accretion model**

887 This study uses a thermal accretion model (Eq. S6) that describes a solid sphere, which gains  
 888 heat through  $^{26}\text{Al}$  decay and loses heat by conduction (Carslaw and Jaeger, 1959). The model  
 889 solves for the temperature at a certain depth within the sphere at any time (t) after accretion and  
 890 we assume that differentiation occurred instantaneously when the temperature halfway to the

891 center of the body from the surface reached 1600 K (Kruijer et al., 2017). This assumption is made  
 892 since ~50 % of silicate melt fractions may be necessary for core formation (Taylor, 1992). In order  
 893 to be consistent with past studies, we assume a radius of  $R = 40$  km for the parent body and the  
 894 temperature is evaluated at a depth of  $r = 20$  km (Kruijer et al., 2017). The background nebular  
 895 temperature is represented as  $T_0$ , thermal conductivity is represented as  $K$ , thermal diffusivity is  
 896 represented as  $k$ , and a  $^{26}\text{Al}$  decay constant of  $\lambda = 9.83 \times 10^{-7} \text{ yr}^{-1}$  is used with a Solar System initial  
 897  $^{26}\text{Al}/^{27}\text{Al}$  ratio of  $5.23 \times 10^{-5}$  (Norris et al., 1983; Jacobsen et al., 2008). All values used in this  
 898 model are listed in Table S1.

899 Eq. S6: 
$$T = T_0 + \frac{kA}{K\lambda} e^{-\lambda t} \left( \frac{R \sin\left(r * \left(\frac{\lambda}{k}\right)^{\frac{1}{2}}\right)}{r \sin\left(R * \left(\frac{\lambda}{k}\right)^{\frac{1}{2}}\right)} - 1 \right) + \frac{2R^3 A}{r\pi^3 K} \sum_{n=1}^{\infty} \frac{(-1)^n}{n(n^2 - \frac{\lambda R^2}{k\pi^2})} \sin\left(\frac{n\pi r}{R}\right) e^{-kn^2\pi^2 t/R^2}$$

900

901 The background temperature is assumed to be 250 K, consistent with models by Hevey and  
 902 Sanders (2006), Kruijer et al. (2014b), and Kruijer et al. (2017), which is the average temperature  
 903 estimated for a circumsolar disk at 2.5 AU and 1 Myr after T-Tauri star formation (Woolum and  
 904 Cassen, 1999). The power per unit volume  $A$  ( $\text{W m}^{-3}$ ) =  $H * \rho$ , where  $H$  is the power per unit mass  
 905 ( $\text{W kg}^{-1}$ ) and  $\rho$  is the density of the planetesimal ( $\text{kg m}^{-3}$ ). The power per unit mass,  $H$ , is equal to  
 906 (total Al atoms/kg) \* ( $^{26}\text{Al}/^{27}\text{Al}$ ) \* ( $2.0 \times 10^{-26} \text{ W/atom}$ ), where ( $^{26}\text{Al}/^{27}\text{Al}$ ) is a function of time, the  
 907 parent body concentration of Al is based off of the range observed in carbonaceous chondrites  
 908 (0.86-1.68 wt. %; Lodders and Fegley, 1998), and the decay power of  $^{26}\text{Al}$  is calculated from a  
 909 decay energy of  $^{26}\text{Al}$  of  $6.4 \times 10^{-13} \text{ J/atom}$  with its half-life of  $9.83 \times 10^{-7} \text{ yr}^{-1}$  (Hevey and Sanders,  
 910 2006). We note that this calculation of heat production differs from that reported by Kruijer et al.  
 911 (2017). Kruijer et al. (2017) report using a range of Al concentration from 8.65-16.8 wt. %, which  
 912 is an order of magnitude greater than used here. In addition, Kruijer et al. (2017) report calculating

913 heat production as  $A = \text{Al concentration} * (^{26}\text{Al}/^{27}\text{Al})$  and it is calculated in this study as  $A = (\text{total}$   
914  $\text{Al atoms/kg}) * (^{26}\text{Al}/^{27}\text{Al}) * (2.0 \times 10^{-26} \text{ W/atom}) * (\rho)$ , where  $(^{26}\text{Al}/^{27}\text{Al})$  is a function of time in both  
915 models. Despite these differences between the model inputs, the results of both models differ by  
916 less than 0.2 Myr. For this study, 0.86 wt. % Al relates to  $A = 12.3 * (^{26}\text{Al}/^{27}\text{Al})$ , 1.20 wt. % Al  
917 relates to  $A = 17.1 * (^{26}\text{Al}/^{27}\text{Al})$  and 1.68 wt. % Al relates to  $A = 23.9 * (^{26}\text{Al}/^{27}\text{Al})$ . Therefore, the  
918 results in this study for 0.86 wt. % Al and 1.20 wt. % Al are similar to the results by Kruijer et al.  
919 (2017) for 12 wt. % Al and 16.8 wt. % Al, respectively.

920 **Supplementary Tables**

921 **Table S1**

922 Osmium isotopic composition data for Milton and the SBT.

| Sample                     | n <sup>a</sup> | $\mu^{189}\text{Os}$ | 2SD | $\mu^{190}\text{Os}$ | 2SD |
|----------------------------|----------------|----------------------|-----|----------------------|-----|
| Milton                     | 1              | -4                   | 8   | 25                   | 18  |
| Babb's Mill                | 2              | 1                    | 6   | -4                   | 7   |
| Babb's Mill ( <i>rep</i> ) | 1              | 8                    | 7   | -1                   | 4   |
| South Byron                | 3              | 8                    | 7   | -4                   | 7   |
| ILD 83500                  | 1              | 3                    | 6   | -3                   | 7   |

923 <sup>a</sup> n is the number of analyses. The reported  $\mu^{189}\text{Os}$  and  $\mu^{190}\text{Os}$  values  
 924 reflect the average values obtained for each meteorite piece. Uncertainties  
 925 reflect the largest (of n analyses) 2SD of the standards run during an  
 926 analytical campaign.



927 **Table S2**

928 Terms and values used in the thermal accretion model.

| Term                                       | Symbol                                          | Units                             | Value                 | Source                            |
|--------------------------------------------|-------------------------------------------------|-----------------------------------|-----------------------|-----------------------------------|
| Al concentration                           | Al                                              | Wt. %                             | 0.86-1.68             | Lodders and Fegley (1998)         |
| Ambient temperature                        | $T_o$                                           | K                                 | 250                   | Woolum and Cassen (1999)          |
| Decay constant                             | $\lambda$                                       | yr <sup>-1</sup>                  | $9.83 \times 10^{-7}$ | Norris et al. (1983)              |
| Decay energy                               | E                                               | J atom <sup>-1</sup>              | $6.4 \times 10^{-13}$ | Hevey and Sanders (2006)          |
| Density                                    | $\rho$                                          | kg m <sup>-3</sup>                | 3200                  | Kruijer et al. (2017)             |
| Diffusivity                                | k                                               | m <sup>2</sup> s <sup>-1</sup>    | $5 \times 10^{-7}$    | Kruijer et al. (2017)             |
| Initial <sup>26</sup> Al/ <sup>27</sup> Al | <sup>26</sup> Al/ <sup>27</sup> Al <sub>i</sub> | atom/atom                         | $5.23 \times 10^{-5}$ | Jacobsen et al. (2008)            |
| Power per unit mass                        | H                                               | W kg <sup>-1</sup>                | <sup>a</sup>          |                                   |
| Power per unit volume                      | A                                               | W m <sup>-3</sup>                 | H x $\rho$            |                                   |
| Depth assessed for temperature             | r                                               | km                                | 20                    | Kruijer et al. (2017)             |
| Radius of body                             | R                                               | km                                | 40                    | Kruijer et al. (2017)             |
| Thermal conductivity                       | K                                               | W m <sup>-1</sup> K <sup>-1</sup> | 2.1                   | LaTourrette and Wasserburg (1998) |

929 <sup>a</sup>  $H = (\text{Al atoms/kg}) * (^{26}\text{Al}/^{27}\text{Al}) * (E * \lambda_{\text{sec}})$ , where (<sup>26</sup>Al/<sup>27</sup>Al) is a function of time and  $\lambda$  is in units of s<sup>-1</sup>.

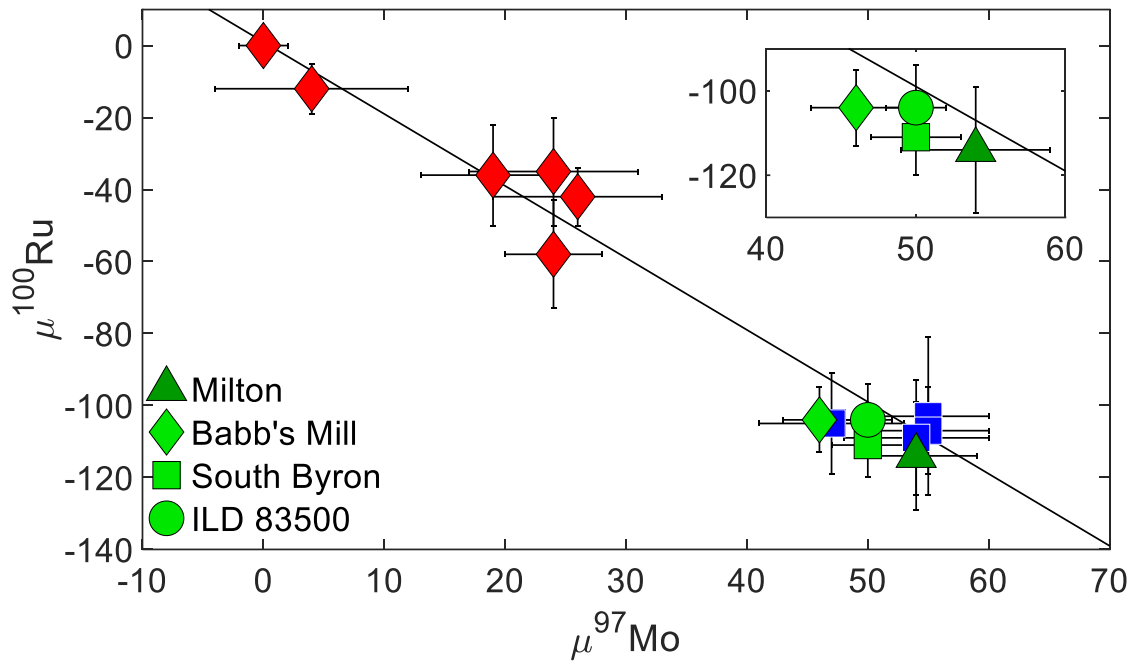

931

932 **Fig. S1.** Compilation of CRE-corrected  $\mu^{97}\text{Mo}$  vs.  $\mu^{100}\text{Ru}$  data for iron meteorites from

933 Birmingham et al. (2018). Blue squares represent meteorites classified as CC type and red

934 diamonds represent meteorites classified as NC type. Data from this study for the SBT and Milton

935 are also plotted. The black line represents the regression of the Mo-Ru cosmic correlation from

936 Birmingham et al. (2018). The inset shows the Mo and Ru isotopic composition of the SBT and

937 Milton without other meteorites.

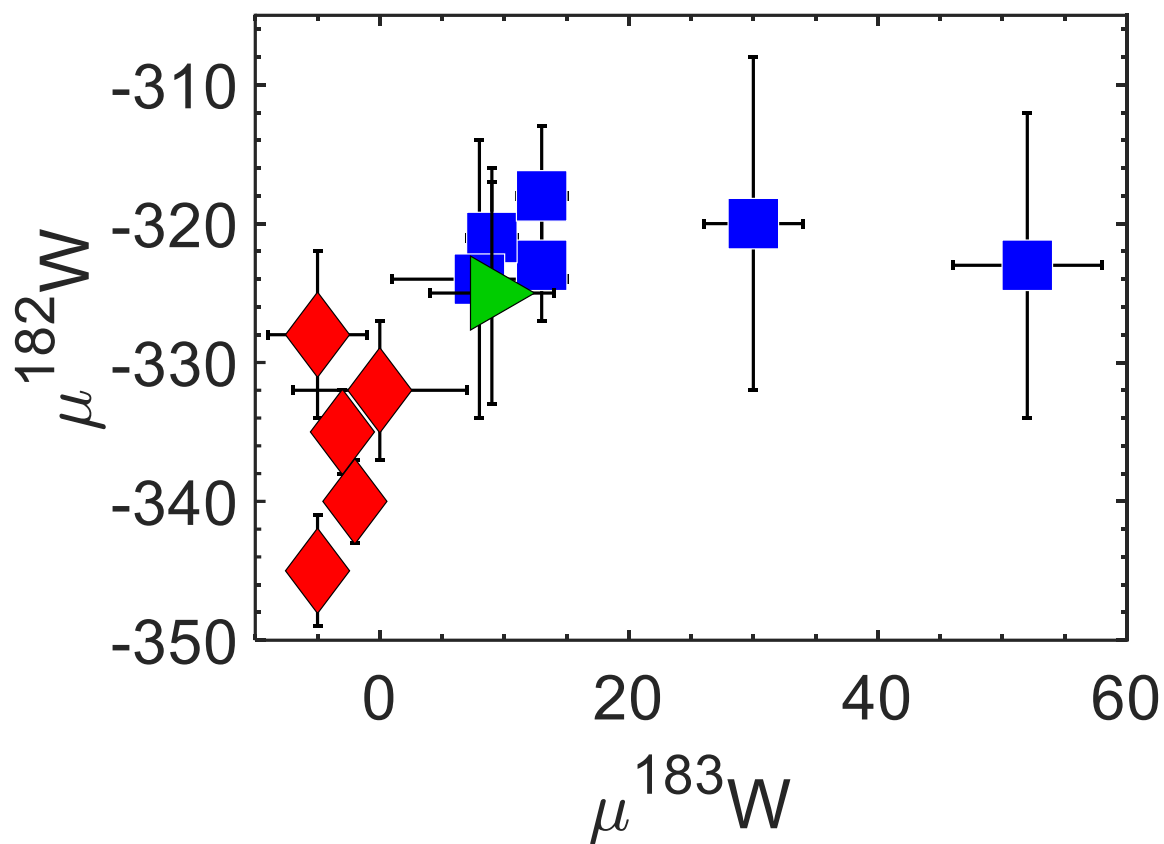

938

939 **Fig. S2.** Compilation of  $\mu^{183}\text{W}$  vs.  $\mu^{182}\text{W}$  data for iron meteorites from Kruijer et al. (2017). Blue  
 940 squares represent meteorites classified as CC type and red diamonds represent meteorites classified  
 941 as NC type. The average SBT W isotopic composition is also plotted (green triangle). The average  
 942  $\mu^{183}\text{W}$  value for the SBT ( $+9 \pm 5$ , 2SE,  $n = 4$ ) is resolved from the W standard value obtained  
 943 during the analytical campaigns for this work ( $0 \pm 2$ , 2SE,  $n = 16$ ).

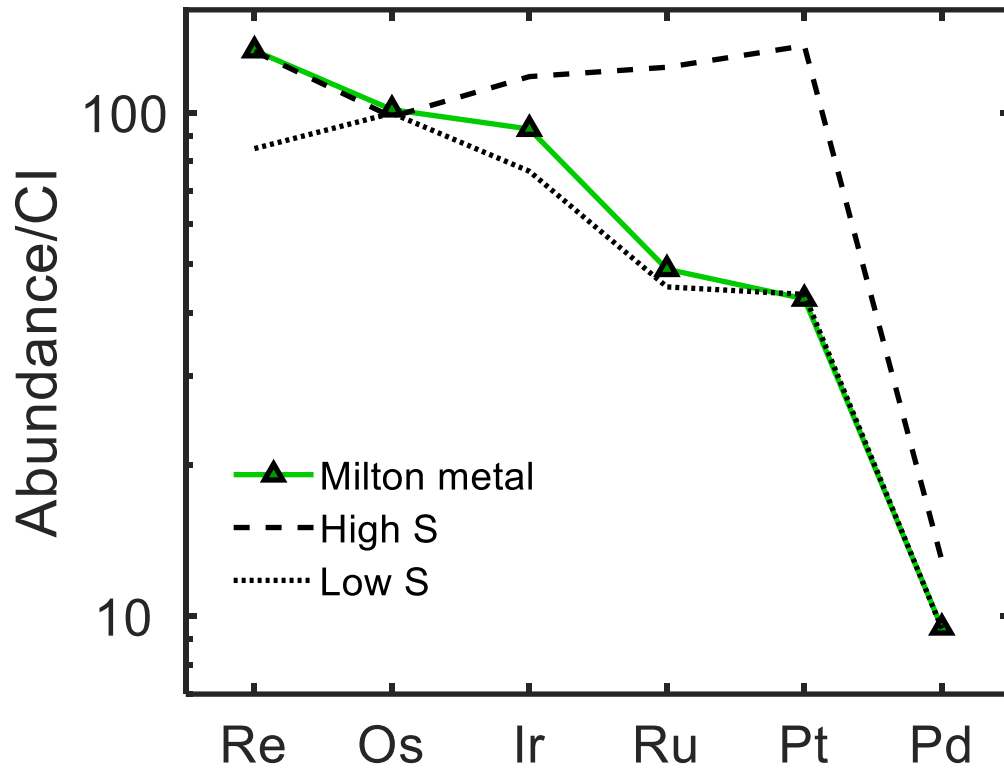

944

945 **Fig. S3.** CI-normalized HSE patterns calculated from a constant HSE initial concentration from  
 946 Table 4 and varying S and P parental melt compositions. Assuming Milton metal crystallized in  
 947 the first ~10% of solid, the Re/Os of Milton metal resembles a high S system with 17 wt. % S, 1.5  
 948 wt. % P, and <0.05 wt. % C. However, the Pt/Os of Milton metal resembles a lower S system with  
 949 8 wt. % S, 1 wt. % P, and <0.05 wt. % C.

950

951

952

953

954

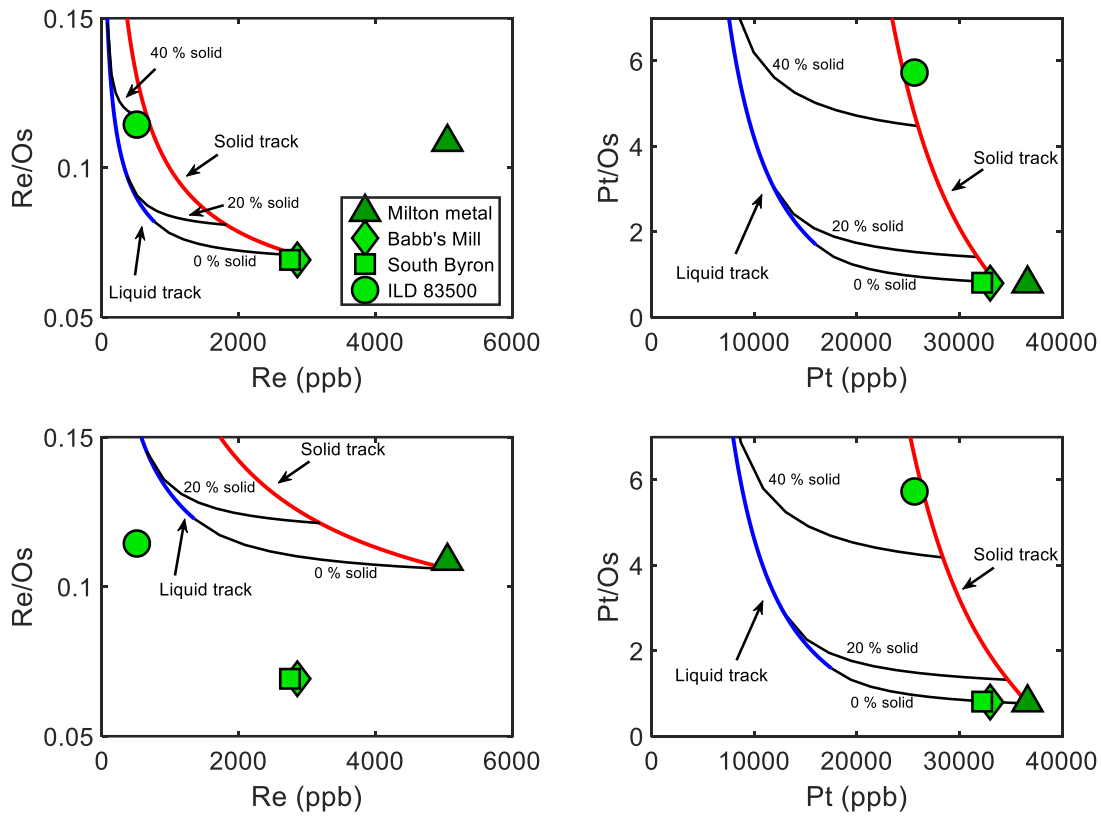

955

956 **Fig. S4.** Fractional crystallization models for Re (ppb) vs. Re/Os and Pt (ppb) vs. Pt/Os for two  
 957 pairs of parental melt compositions. Black lines represent mixing between solid and liquid, at 0 %  
 958 solid-100 % liquid, 20 % solid-80 % liquid, and 40 % solid-60 % liquid. (*Upper left and right*)  
 959 Fractional crystallization model, which reproduce the HSE patterns observed for the SBT,  
 960 calculated for the initial parameters listed in Table 4. (*Bottom left and right*) Fractional  
 961 crystallization model with 7 wt. % S and 1 wt. % P, which can reproduce the observed HSE  
 962 patterns for Milton metal. This model requires a starting liquid composition of Re = 1,350 ppb, Os  
 963 = 11,000 ppb, and Pt = 17,500 ppb. Neither model can reproduce both Re/Os and Pt/Os observed  
 964 in Milton metal and the SBT through solid metal-liquid metal mixing.

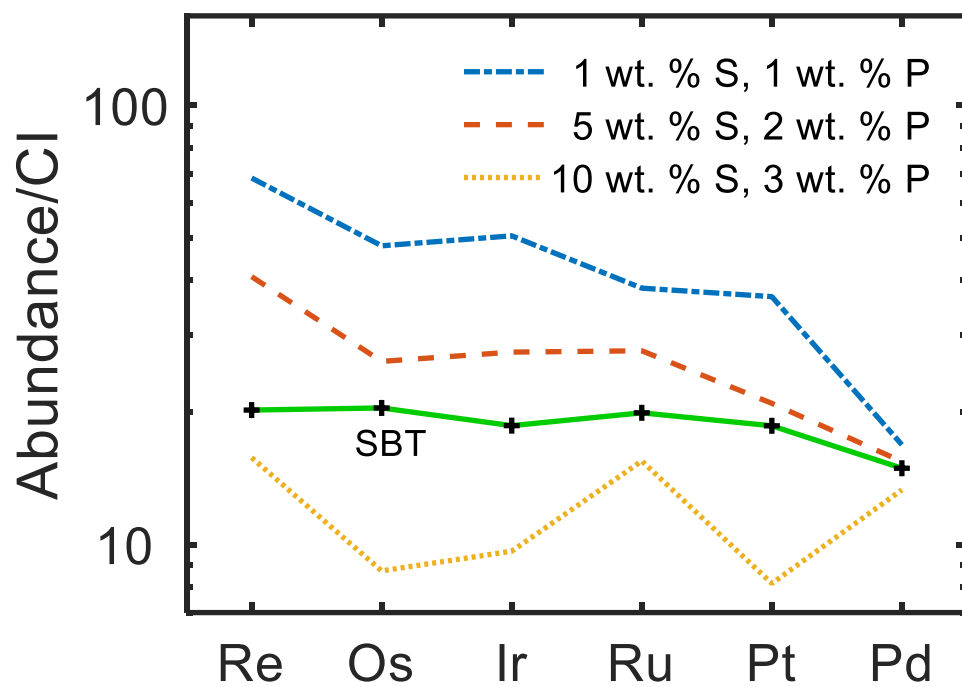

965

966 **Fig. S5.** CI-normalized HSE parental melt compositions, with varying S and P contents, which  
 967 reproduce the Milton HSE pattern as an early (<10 %) fractional crystallizing metal. The parental  
 968 melt composition of the SBT is shown for comparison.

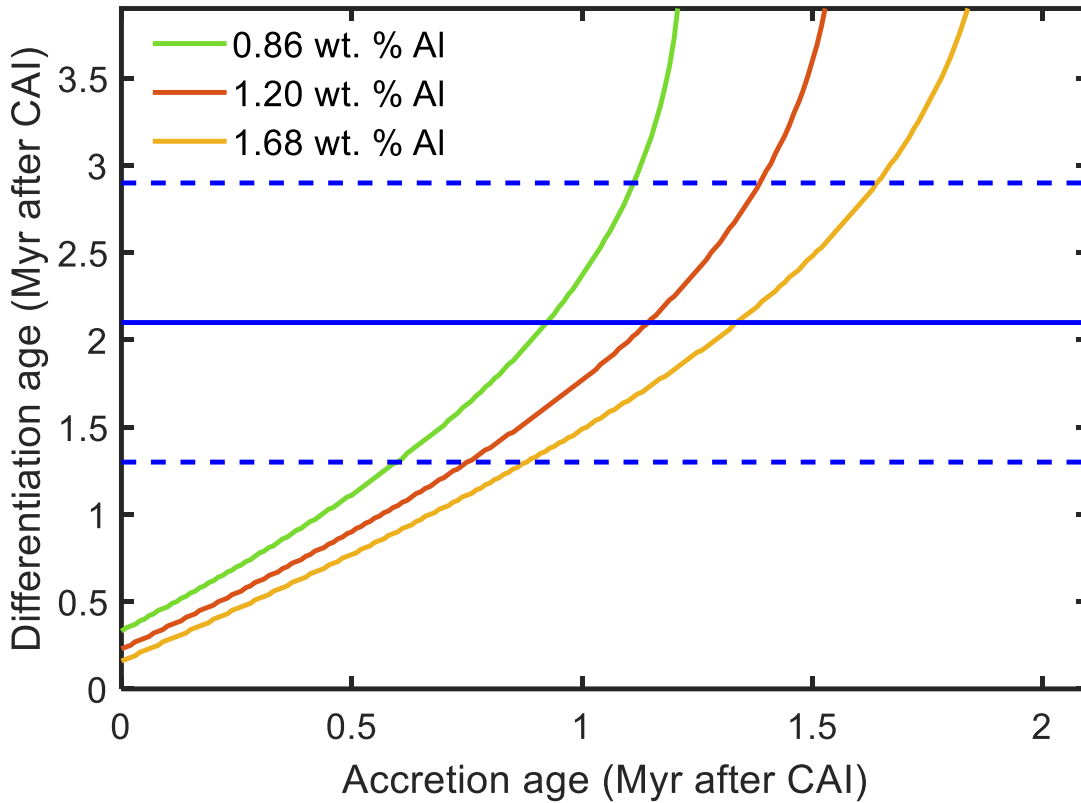

969

970 **Fig. S6.** Thermal model results for a 40 km radius body when evaluating the temperature midway  
 971 to the center of the body ( $r = 20$  km). The model is based on an assumption of instantaneous  
 972 differentiation when the temperature reaches 1600 K. Thermal model results are shown for Al  
 973 concentrations of 0.86, 1.20, and 1.68 wt. %. The differentiation age of the SBT ( $2.1 \pm 0.8$  Myr  
 974 after CAI formation; blue solid line  $\pm$  blue dashed lines) fits an accretion age range of  $1.1 \pm 0.5$   
 975 Myr after CAI formation.

976 **Supplementary References**

977  
978 Allègre C.J. and Luck J.-M. (1980) Osmium isotopes as petrogenetic and geological tracers. *Earth*  
979 *Planet. Sci. Lett.* **48**, 148–154.

980  
981 Archer G.J., Mundl A., Walker R.J., Worsham E.A., Bermingham K.R. (2017) High-precision  
982 analysis of  $^{182}\text{W}/^{184}\text{W}$  and  $^{183}\text{W}/^{184}\text{W}$  by negative thermal ionization mass spectrometry:  
983 per-integration oxide corrections using measured  $^{18}\text{O}/^{16}\text{O}$ . *Int. J. Mass Spectrom.* **414**, 80-  
984 86.

985  
986 Archer G.J., Walker R.J., Tino J., Blackburn T., Kruijer T.S., Hellmann J.L. (2019) Siderophile  
987 element constraints on the thermal history of the H chondrite parent body. *Geochim.*  
988 *Cosmochim. Acta* **245**, 556-576.

989  
990 Bermingham K.R., Walker R.J., Worsham E.A. (2016) Refinement of high precision Ru isotope  
991 analysis using negative thermal ionization mass spectrometry. *Int. J. Mass Spectrom.* **403**,  
992 15-26.

993  
994 Bermingham K.R., Worsham E.A., Walker R.J. (2018) New insights into Mo and Ru isotope  
995 variation in the nebula and terrestrial planet accretionary genetics. *Earth Planet. Sci. Lett.*  
996 **487**, 221-229.

997



998 Birck J.-L., Roy-Barman M., Capmas F. (1997) Re–Os isotopic measurements at the femtomole  
999 level in natural samples. *Geostand. Newsl.* **20**, 9–27.  
1000

1001 Carlslaw H. S. and Jaeger J. C. (1959) *Conduction of heat in solids*. Oxford: Oxford University  
1002 Press.  
1003

1004 Chabot N. L. and Jones J. H. (2003) Parameterizing iron meteorite partitioning experiments.  
1005 *Meteorit. Planet. Sci.* **37**, 1425–1436.  
1006

1007 Chabot N.L., Wollack E.A., McDonough W.F., Ash R.D., Saslow S.A. (2017) Experimental  
1008 determination of partitioning in the Fe-Ni system for applications to modeling meteoritic  
1009 metals. *Meteorit. Planet. Sci.* **52**, 1133-1145.  
1010

1011 Chen J.H., Papanastassiou D.A., Wasserburg G.J. (2010) Ruthenium endemic isotope effects in  
1012 chondrites and differentiated meteorites. *Geochim. Cosmochim. Acta* **74**, 3851–3862.  
1013

1014 Cohen A.S. and Waters F.J. (1996) Separation of osmium from geological materials by solvent  
1015 extraction for analysis by thermal ionization mass spectrometry. *Anal. Chimica Acta* **332**,  
1016 269–275.  
1017

1018 Cook D.L. and Schönbacher M. (2016) High-precision measurement of W isotopes in Fe-Ni alloy  
1019 and the effects from the nuclear field shift. *J. Anal. At. Spectrom.* **31**, 1400-1405.  
1020

- 1021 Dodson R. W., Forney G. J., Swift E. H. (1936) The extraction of ferric chloride from hydrochloric  
1022 acid solutions by isopropyl ether. *J. Am. Chem. Soc.* **58**, 2573-2577.  
1023
- 1024 Hevey P.J. and Sanders I.S. (2006) A model for planetesimal meltdown by  $^{26}\text{Al}$  and its implications  
1025 for meteorite parent bodies. *Meteorit. Planet. Sci* **41**, 95-106.  
1026
- 1027 Jacobsen B., Yin Q.-z., Moynier F., Amelin Y., Krot A.N., Nagashima K., Hutcheon I.D., Palme  
1028 H. (2008)  $^{26}\text{Al}$ - $^{26}\text{Mg}$  and  $^{207}\text{Pb}$ - $^{206}\text{Pb}$  systematics of Allende CAIs: canonical solar system  
1029 initial  $^{26}\text{Al}/^{27}\text{Al}$  ratio reinstated. *Earth Planet. Sci. Lett.* **272**, 353-364.  
1030
- 1031 Jones J. H. and Malvin D. J. (1990) A nonmetal interaction model for the segregation of the trace  
1032 metals during solidification of Fe-Ni-S, Fe-Ni-P, Fe-Ni-S-P alloys. *Metall. Trans. B*  
1033 **21B**, 697-706.  
1034
- 1035 Kleine, T., Mezger, K., Münker, C., Palme, H., Bischoff, A. (2004)  $^{182}\text{Hf}$ - $^{182}\text{W}$  isotope systematics  
1036 of chondrites, eucrites, and Martian meteorites: chronology of core formation and mantle  
1037 differentiation in Vesta and Mars. *Geochim. Cosmochim. Acta* **68**, 2935-2946.  
1038
- 1039 Kruijer T.S., Fischer-Gödde M., Kleine T., Sprung P., Leya I., Wieler R. (2013) Neutron capture  
1040 on Pt isotopes in iron meteorites and the Hf-W chronology of core formation in  
1041 planetesimals. *Earth Planet. Sci. Lett.* **361**, 162-172.  
1042

1043 Kruijjer T.S., Kleine T., Fischer-Gödde M., Burkhardt C., Wieler R. (2014a) Nucleosynthetic W  
1044 isotope anomalies and the Hf-W chronometry of Ca-Al-rich inclusions. *Earth Planet. Sci.*  
1045 *Lett.* **403**, 317-327.

1046

1047 Kruijjer T.S., Touboul M., Fischer-Gödde M., Bermingham K.R., Walker R.J., Kleine T. (2014b)  
1048 Protracted core formation and rapid accretion of protoplanets. *Science* **344**, 1150–1154.

1049

1050 Kruijjer T.S., Burkhardt C., Budde G., Kleine T. (2017) Age of Jupiter inferred from the distinct  
1051 genetics and formation times of meteorites. *Proc. Natl. Acad. Sci.* **114**, 6712-6716.

1052

1053 Kruijjer T.S. and Kleine T. (2018) No  $^{182}\text{W}$  excess in the Ontong Java Plateau source. *Chem. Geol.*  
1054 **485**, 24-31.

1055

1056 LaTourrette T. and Wasserburg G.J. (1998) Mg diffusion in anorthite: Implications for the  
1057 formation of early solar system planetesimals. *Earth Planet. Sci. Lett.* **158**, 91–108.

1058

1059 Lodders K. and Fegley B. (1998) *The Planetary Scientist's Companion*. Oxford Univ Press, New  
1060 York, 371 pp.

1061

1062 Lu Q. and Masuda A. (1994) The isotopic composition and atomic weight of molybdenum. *Int. J.*  
1063 *Mass Spectrom. Ion Process.* **130**, 65–72.

1064

1065 Mundl A., Touboul M., Jackson M.G., Day J.M.D., Kurz M.D., Lekic V., Helz R.T., Walker R.J.  
1066 (2017) Tungsten-182 heterogeneity in modern ocean island basalts. *Science* **356**, 66-69.  
1067

1068 Mundl A., Walker R.J., Reimink J.R., Rudnick R.L., Gaschnig R.M. (2018) Tungsten-182 in the  
1069 upper continental crust: Evidence from glacial diamictites. *Chem. Geol.* **494**, 144-152.  
1070

1071 Nier A.O. (1950) A redetermination of the relative abundances of the isotopes of carbon, nitrogen,  
1072 oxygen, argon, and potassium. *Phys. Rev.* **77**, 789–793.  
1073

1074 Norris T.L., Gancarz A.J., Rokop D.J., Thomas K.W. (1983) Half-life of <sup>26</sup>Al. *J. Geophys. Res.*  
1075 **88**, B331-B333.  
1076

1077 Shirey S.B. and Walker R.J. (1995) Carius tube digestion for low-blank rhenium-osmium analysis.  
1078 *Anal. Chem.* **34**, 2136-2141.  
1079

1080 Taylor G.J. (1992) Core formation in asteroids. *J. Geophys. Res.* **97**, 14717-14726.  
1081

1082 Touboul M. and Walker R.J. (2012) High precision tungsten isotope measurement by thermal  
1083 ionization mass spectrometry. *Int. J. of Mass Spectrom.* **309**, 109-117.  
1084

1085 Vockenhuber C., Oberli F., Bichler M., Ahmad I., Quittem G., Meier M., Halliday A.N., Lee D.-  
1086 C., Kutschera W., Steier P., Gehrke R.J., Helmer R.G. (2004) New half-life measurement

1087 of  $^{182}\text{Hf}$ : Improved chronometer for the early solar system. *Physical Review Letters* **93**,  
1088 172501-1-172501-4.

1089

1090 Volkening J., Köppe M., Heumann K.G. (1991) Tungsten isotope ratio determinations by negative  
1091 thermal ionization mass spectrometry. *Int. J. Mass Spectrom.* **107**, 361–368.

1092

1093 Walker R.J., McDonough W.F., Honesto J., Chabot N.L., McCoy T.J., Ash R.D., Bellucci J.J.  
1094 (2008) Modeling fractional crystallization of group IVB iron meteorites. *Geochim.*  
1095 *Cosmochim. Acta* **72**, 2198-2216.

1096 Walker R.J. (2012) Evidence for homogeneous distribution of osmium in the protosolar nebula.  
1097 *Earth Planet. Sci. Lett.* **351-352**, 36-44.

1098

1099 Woolum D. S. and Cassen P. (1999) Astronomical constraints on nebular temperatures:  
1100 Implications for planetesimal formation. *Meteorit. Planet. Sci* **34**, 897–907.

1101

1102 Worsham E.A., Walker R.J., Bermingham K.R. (2016a) High-precision molybdenum isotope  
1103 analysis by negative thermal ionization mass spectrometry. *Int. J. Mass Spectrom.* **407**, 51-  
1104 61.

1105

1106 Worsham E.A., Bermingham K.R., Walker R.J. (2016b) Siderophile element systematics of IAB  
1107 complex iron meteorites: new insights into the formation of an enigmatic group. *Geochim.*  
1108 *Cosmochim. Acta* **188**, 261-283.
